# Supplementary material for: Determinants of Awareness and Intensity of Use of Maize Grades and Standards among Smallholder Farmers in Northern Uganda
Source: Research Square preprint supplement (doi:10.21203/rs.3.rs-7670719/v1), 2025-10-22
Supplement: Supplementary file 1 [file e24945f8b4e9cf1dd5d20637.docx]

**DATA COLLECTION TOOL (QUESTIONNAIRE)**

**DETERMINANTS OF AWARENESS AND INTENSITY OF USE OF MAIZE GRADES AND STANDARDS AMONG SMALLHOLDER FARMERS IN NORTHERN UGANDA**

Date: **……………….** District **…………………** Sub-County **……………….** Parish **………………**

Village **…………….**

**SECTION A: SOCIO-ECONOMIC, SOCIO-DEMOGRAPHIC AND MAIZE PRODUCTION DATA (PLEASE INDICATE AND/OR TICK WHERE APPLICABLE)**.

| **Qn.** | **Question** | **Responses** |
| --- | --- | --- |
| 1 | Gender of the respondent | 1 = Male  2 = Female |
| 2 | Age **(*in completed years)*** |  |
| 3 | Educational Status (in years) |  |
| 4 | Marital Status | 1 = Married  2 = Single  3 = Widowed/Widower  4 = Divorced |
| 5 | Household Size (Number of people who live and eat together) |  |
| 6 | Years of Maize Farming Enterprise (years) |  |
| 7 | Do you have any other enterprise other than maize farming? | 1 = Yes  2 = No |
| 8 | If yes, what is your other enterprise (s)? |  |
| 9 | What is the estimate of the amount of money realized from the  other farming enterprise(s) monthly? (In UGX) |  |
| 10 | Do you readily have access to market? | 1 = Yes  2 = No |
| 11 | Distance to adjacent market (in km) |  |
| 12 | Do you have access to credit? | 1 = Yes  2 = No |
|  | If yes, what are the uses of credit obtained |  |
|  | Indicate amount of credit used for maize production (In Ugx) |  |
| 13 | Are you a member of a farming association/ producer  group/cooperative society? | 1 = Yes  2 = No |
|  | If yes how does the group support maize production? |  |
|  | If the group bulks maize, what is the nature of the bulking store? | 1. Permanent with recommended pallets 2. No permanent store |
| 14 | What is the source credit? | 1 = Personal Savings 2 = Borrowed Loan 3 = Others (Specify)  ………………………… |
| 15 | Land size owned (acres) |  |
|  | Land size used for crop production (acres) |  |
|  | Land size used for maize production per year (acres) |  |
|  | What type of maize varieties do you grow | 1. Improved varieties 2. Local varieties 3. Both varieties |
| 16 | Land acreage devoted to improved varieties |  |
|  | List purchased inputs used in maize production |  |
|  | Distance to nearest input purchase point (Km) |  |
|  | What is average production cost per acre of maize (UGX) |  |
|  | What storage facilities do you have for your maize |  |
|  | What equipment do you have to control maize grain quality | 1. Improved storage bags 2. Storage containers 3. Moisture meters 4. Tumpline 5. Grain sorter/sieves |

**SECTION B: AWARENESS OF THE RECOMMENDED GRADES AND STANDARDS**

The statements in this section relate to your attitudes on quality of maize grain. Answer the following questions by ticking a box that reflects your evaluation of each statement given below using a five-point Likert scale, 1= Not aware, 2= Less aware, 3= Neutral, 4= Moderately aware, 5= Highly aware

|  | Variable | Response | | | | |
| --- | --- | --- | --- | --- | --- | --- |
|  |  | 1  Not Aware | 2  Less Aware | 3  Neutral | 4  Moderate Aware | 5  Highly Aware |
| 1 | Have you heard of maize grading and standardization before |  |  |  |  |  |
| 2 | Are you aware of the different grades of maize |  |  |  |  |  |
| 3 | Are you aware of the characteristics that makes up each grade |  |  |  |  |  |
| 4 | Are you aware of the EAC recommended grades and standards |  |  |  |  |  |
| 5 | Are you aware of the benefits of maize grading and  Standardization |  |  |  |  |  |
| 6 | Are you aware of the certification bodies that controls grading  and standardization |  |  |  |  |  |
| 7 | Are you aware that grading can help add value to your maize  Product |  |  |  |  |  |
| 8 | Are you aware that standardization helps to make the quality  specifications of maize grades uniform among buyers and sellers |  |  |  |  |  |

**Different maize grades and standards for Uganda and EAC grain council**

| **Maize Grain Characteristics** | **Maximum Limits** | | |
| --- | --- | --- | --- |
| Grade 1 | Grade 2 | Grade 3 |
| Foreign Matter, % | 0.5 | 1.0 | 1.5 |
| Inorganic Matter % | 0.25 | 0.5 | 0.75 |
| Broken Kernels % | 2.0 | 4.0 | 6.0 |
| Pest damaged grains | 1.0 | 3.0 | 5.0 |
| Rotten and Diseased grains | 2.0 | 4.0 | 5.0 |
| Discolored grains | 0.5 | 1.0 | 1.5 |
| Moisture % | 13.5 | | |
| Immature/Shriveled grains, % | 1.0 | 2.0 | 3.0 |
| Filth, % | 0.1 | | |

**Which of the following grades do you practice on your farm”?**

| **Maize Grades** | **YES** | **NO** |
| --- | --- | --- |
| Grade 1 |  |  |
| Grade 2 |  |  |
| Grade 3 |  |  |

**SECTION C: FARMERS PARTICPATION IN MAIZE GRADING AND STANDARDIZATION**

| 1 | Do you participate in maize grading and standardization? | 1 = Yes  2 = No |
| --- | --- | --- |
| 2 | If you are not a participant, then explain why you are not? | 1 = lack of equipment 2 = Inadequate capital 3 = Lack of awareness 4 = Others (specify)  ……………………….. |
| 3 | If you are participant in maize grading and standardization, for how many years have you been involved? |  |
| 4 | What is the distance from your farm to the grading and  standardization location? |  |
| 5 | Explain why you are a maize grading and standardization participant |  |
| 6 | Do you have access to market price information? | 1 = Yes  2 = No |
|  | If yes, …... |  |
| 7 | Do you have access to extension services on maize grading and standardization? | 1 = Yes  2 = No |
| 8 | If yes, who offers the extension services on maize production? | 1 = VSLA  2 = NGOs  3= Government  4= Other(specify)  ………………………… |
| 9 | How do you sell market harvested maize grains? | 1 = farm gate  2 = group marketing  3 = contract marketing |
| 10 | What is the quantity of maize produced in the last planting  season? | ………………….KG |
| 11 | What quantity of maize produced was graded and standardized  in last planting season? | ………………….KG |
| 12 | What are your means of maize transportation to the market? | 1 = Motor cycle 2 = vehicle  3 = Others |
| 13 | What is the distance to the market where you sell your maize? |  |
| 14 | What maize marketing channels do you have for selling your maize? | 1 =WFP  2 = FAO  3 = Export Organizations 4 =Others |
| 15 | What maize storage facility do you use? | 1 = Personal store  2 = Community silo 3 = Maize cribs  4 = Other |
| 16 | Do you wish to continue to participate in maize grading and  standardization? | 1 = Yes  2 = No |
| 17 | If no, why? |  |

**Thank you**
